# Supplementary material for: Genome-wide identification and expression analysis of GRAS transcription factors under cold stress in diploid and triploid Eucalyptus
Source: Front Genet. 2025 Jan 29;16:1436285. doi: 10.3389/fgene.2025.1436285 (PMC11814439; doi:10.3389/fgene.2025.1436285)
Supplement: Supplementary file 7 [file Table7.xlsx]

## Sheet: Egr.vs.Os
Table S7-1 The synteny pairs of GRAS genes between E. grandis and Rice
Egr-Chr	Gene ID		Os-Chr	Gene ID
Chr01	Eucgr.A01279.1.v2.0	==	Chr1	LOC_Os01g62460.1.MSUv7.0
Chr02	Eucgr.B02328.1.v2.0	==	Chr1	LOC_Os01g62460.1.MSUv7.0
Chr05	Eucgr.E01509.1.v2.0	==	Chr2	LOC_Os02g44360.1.MSUv7.0
Chr05	Eucgr.E01509.1.v2.0	==	Chr4	LOC_Os04g46860.1.MSUv7.0
Chr07	Eucgr.G02939.1.v2.0	==	Chr1	LOC_Os01g62460.1.MSUv7.0
Chr07	Eucgr.G03258.1.v2.0	==	Chr1	LOC_Os01g71970.1.MSUv7.0
Chr08	Eucgr.H04688.1.v2.0	==	Chr1	LOC_Os01g67650.1.MSUv7.0
Chr10	Eucgr.J02040.1.v2.0	==	Chr1	LOC_Os01g62460.1.MSUv7.0
Chr11	Eucgr.K02752.1.v2.0	==	Chr1	LOC_Os01g67650.1.MSUv7.0
Chr11	Eucgr.K03117.1.v2.0	==	Chr1	LOC_Os01g62460.1.MSUv7.0
Chr11	Eucgr.K01320.1.v2.0	==	Chr11	LOC_Os11g03110.1.MSUv7.0
Chr11	Eucgr.K01320.1.v2.0	==	Chr12	LOC_Os12g02870.1.MSUv7.0
Chr11	Eucgr.K03117.1.v2.0	==	Chr12	LOC_Os12g38490.1.MSUv7.0

## Sheet: Egr.vs.At
Table S7-2 The synteny pairs of GRAS genes between E. grandis and Arabidopsis
Egr-Chr	Gene ID		At-Chr	Gene ID
Chr01	Eucgr.A01279.1.v2.0	==	Chr2	AT2G29060.1.TAIR10
Chr01	Eucgr.A01051.1.v2.0	==	Chr2	AT2G04890.1.TAIR10
Chr01	Eucgr.A02754.1.v2.0	==	Chr5	AT5G52510.1.TAIR10
Chr02	Eucgr.B02328.1.v2.0	==	Chr1	AT1G07520.1.TAIR10
Chr02	Eucgr.B02328.1.v2.0	==	Chr2	AT2G29060.1.TAIR10
Chr02	Eucgr.B02328.1.v2.0	==	Chr3	AT3G46600.1.TAIR10
Chr02	Eucgr.B02328.1.v2.0	==	Chr5	AT5G59450.1.TAIR10
Chr04	Eucgr.D01917.1.v2.0	==	Chr1	AT1G63100.1.TAIR10
Chr05	Eucgr.E01509.1.v2.0	==	Chr2	AT2G45160.1.TAIR10
Chr05	Eucgr.E01509.1.v2.0	==	Chr3	AT3G60630.1.TAIR10
Chr05	Eucgr.E03895.1.v2.0	==	Chr4	AT4G17230.1.TAIR10
Chr06	Eucgr.F01978.1.v2.0	==	Chr1	AT1G55580.1.TAIR10
Chr06	Eucgr.F03769.1.v2.0	==	Chr4	AT4G08250.1.TAIR10
Chr07	Eucgr.G02163.1.v2.0	==	Chr1	AT1G14920.1.TAIR10
Chr07	Eucgr.G02939.1.v2.0	==	Chr2	AT2G37650.1.TAIR10
Chr07	Eucgr.G02939.1.v2.0	==	Chr2	AT2G29060.1.TAIR10
Chr07	Eucgr.G02163.1.v2.0	==	Chr2	AT2G01570.1.TAIR10
Chr07	Eucgr.G02939.1.v2.0	==	Chr5	AT5G59450.1.TAIR10
Chr08	Eucgr.H02292.1.v2.0	==	Chr3	AT3G49950.1.TAIR10
Chr08	Eucgr.H01257.1.v2.0	==	Chr4	AT4G36710.1.TAIR10
Chr08	Eucgr.H02292.1.v2.0	==	Chr5	AT5G67411.1.TAIR10
Chr09	Eucgr.I02451.1.v2.0	==	Chr3	AT3G50650.1.TAIR10
Chr09	Eucgr.I00704.1.v2.0	==	Chr4	AT4G37650.1.TAIR10
Chr09	Eucgr.I02451.1.v2.0	==	Chr5	AT5G66770.1.TAIR10
Chr10	Eucgr.J02040.1.v2.0	==	Chr1	AT1G07520.1.TAIR10
Chr10	Eucgr.J01594.1.v2.0	==	Chr1	AT1G66350.1.TAIR10
Chr10	Eucgr.J01594.1.v2.0	==	Chr2	AT2G01570.1.TAIR10
Chr10	Eucgr.J02040.1.v2.0	==	Chr2	AT2G29060.1.TAIR10
Chr10	Eucgr.J02040.1.v2.0	==	Chr3	AT3G46600.1.TAIR10
Chr10	Eucgr.J02040.1.v2.0	==	Chr5	AT5G59450.1.TAIR10
Chr11	Eucgr.K03117.1.v2.0	==	Chr1	AT1G07520.1.TAIR10
Chr11	Eucgr.K03117.1.v2.0	==	Chr2	AT2G37650.1.TAIR10
Chr11	Eucgr.K03117.1.v2.0	==	Chr2	AT2G29060.1.TAIR10

## Sheet: Egr.vs.Sl
Table S7-3 The synteny pairs of GRAS genes between E. grandis and tomato
Egr-Chr	Gene ID		Sl-Chr	Gene ID
Chr01	Eucgr.A01279.1.v2.0	==	Chr10	Solyc10T002934.1.ITAG5.0
Chr01	Eucgr.A02754.1.v2.0	==	Chr3	Solyc03T000325.1.ITAG5.0
Chr01	Eucgr.A01279.1.v2.0	==	Chr4	Solyc04T000448.1.ITAG5.0
Chr01	Eucgr.A02754.1.v2.0	==	Chr6	Solyc06T000710.1.ITAG5.0
Chr01	Eucgr.A01279.1.v2.0	==	Chr6	Solyc06T002468.1.ITAG5.0
Chr01	Eucgr.A01051.1.v2.0	==	Chr7	Solyc07T001795.1.ITAG5.0
Chr01	Eucgr.A00903.1.v2.0	==	Chr7	Solyc07T001633.1.ITAG5.0
Chr01	Eucgr.A01279.1.v2.0	==	Chr9	Solyc09T000503.1.ITAG5.0
Chr02	Eucgr.B02328.1.v2.0	==	Chr10	Solyc10T002934.1.ITAG5.0
Chr02	Eucgr.B02335.1.v2.0	==	Chr5	Solyc05T002534.1.ITAG5.0
Chr02	Eucgr.B02328.1.v2.0	==	Chr6	Solyc06T002468.1.ITAG5.0
Chr02	Eucgr.B02328.1.v2.0	==	Chr9	Solyc09T000503.1.ITAG5.0
Chr04	Eucgr.D01435.1.v2.0	==	Chr4	Solyc04T000571.1.ITAG5.0
Chr04	Eucgr.D01917.1.v2.0	==	Chr8	Solyc08T002300.1.ITAG5.0
Chr05	Eucgr.E01509.1.v2.0	==	Chr1	Solyc01T002687.1.ITAG5.0
Chr05	Eucgr.E03895.1.v2.0	==	Chr4	Solyc04T000571.1.ITAG5.0
Chr05	Eucgr.E03895.1.v2.0	==	Chr5	Solyc05T002534.1.ITAG5.0
Chr05	Eucgr.E03895.1.v2.0	==	Chr7	Solyc07T002691.1.ITAG5.0
Chr06	Eucgr.F02630.1.v2.0	==	Chr11	Solyc11T000844.1.ITAG5.0
Chr06	Eucgr.F01003.1.v2.0	==	Chr12	Solyc12T000032.1.ITAG5.0
Chr06	Eucgr.F04276.1.v2.0	==	Chr4	Solyc04T002016.1.ITAG5.0
Chr06	Eucgr.F03414.1.v2.0	==	Chr7	Solyc07T002561.1.ITAG5.0
Chr06	Eucgr.F03523.1.v2.0	==	Chr7	Solyc07T002691.1.ITAG5.0
Chr06	Eucgr.F01003.1.v2.0	==	Chr7	Solyc07T002561.1.ITAG5.0
Chr06	Eucgr.F01978.1.v2.0	==	Chr7	Solyc07T002787.1.ITAG5.0
Chr07	Eucgr.G02939.1.v2.0	==	Chr10	Solyc10T002934.1.ITAG5.0
Chr07	Eucgr.G02939.1.v2.0	==	Chr4	Solyc04T000448.1.ITAG5.0
Chr07	Eucgr.G02939.1.v2.0	==	Chr5	Solyc05T002426.1.ITAG5.0
Chr07	Eucgr.G02939.1.v2.0	==	Chr6	Solyc06T002468.1.ITAG5.0
Chr07	Eucgr.G02939.1.v2.0	==	Chr9	Solyc09T000503.1.ITAG5.0
Chr08	Eucgr.H04039.1.v2.0	==	Chr1	Solyc01T002106.1.ITAG5.0
Chr08	Eucgr.H01257.1.v2.0	==	Chr2	Solyc02T002167.1.ITAG5.0
Chr08	Eucgr.H03356.1.v2.0	==	Chr2	Solyc02T002959.1.ITAG5.0
Chr08	Eucgr.H02292.1.v2.0	==	Chr2	Solyc02T002778.1.ITAG5.0
Chr08	Eucgr.H04039.1.v2.0	==	Chr5	Solyc05T002461.1.ITAG5.0
Chr09	Eucgr.I00236.1.v2.0	==	Chr11	Solyc11T000056.1.ITAG5.0
Chr09	Eucgr.I00704.1.v2.0	==	Chr2	Solyc02T002757.1.ITAG5.0
Chr09	Eucgr.I01625.1.v2.0	==	Chr2	Solyc02T002959.1.ITAG5.0
Chr10	Eucgr.J01594.1.v2.0	==	Chr11	Solyc11T000510.1.ITAG5.0
Chr10	Eucgr.J01594.1.v2.0	==	Chr11	Solyc11T000510.1.ITAG5.0
Chr10	Eucgr.J02815.1.v2.0	==	Chr12	Solyc12T002083.1.ITAG5.0
Chr10	Eucgr.J02815.1.v2.0	==	Chr3	Solyc03T003531.1.ITAG5.0
Chr10	Eucgr.J02040.1.v2.0	==	Chr6	Solyc06T002468.1.ITAG5.0
Chr10	Eucgr.J02040.1.v2.0	==	Chr9	Solyc09T000503.1.ITAG5.0
Chr11	Eucgr.K01320.1.v2.0	==	Chr10	Solyc10T002048.1.ITAG5.0
Chr11	Eucgr.K03117.1.v2.0	==	Chr10	Solyc10T002934.1.ITAG5.0
Chr11	Eucgr.K03117.1.v2.0	==	Chr6	Solyc06T002468.1.ITAG5.0
Chr11	Eucgr.K00873.1.v2.0	==	Chr7	Solyc07T002006.1.ITAG5.0
Chr11	Eucgr.K03117.1.v2.0	==	Chr9	Solyc09T000503.1.ITAG5.0

## Sheet: Egr.vs.Pt
Table S7-4 The synteny pairs of GRAS genes between E. grandis and Populus
Egr-Chr	Gene ID		Pt-Chr	Gene ID
Chr01	Eucgr.A01279.1.v2.0	==	Chr01	Potri.001G241700.1.v3.1
Chr01	Eucgr.A00903.1.v2.0	==	Chr06	Potri.006G021400.1.v3.1
Chr01	Eucgr.A01279.1.v2.0	==	Chr06	Potri.006G086600.4.v3.1
Chr01	Eucgr.A01051.1.v2.0	==	Chr06	Potri.006G016200.2.v3.1
Chr01	Eucgr.A01279.1.v2.0	==	Chr08	Potri.008G057400.2.v3.1
Chr01	Eucgr.A01279.1.v2.0	==	Chr09	Potri.009G032700.2.v3.1
Chr01	Eucgr.A01051.1.v2.0	==	Chr14	Potri.014G164400.1.v3.1
Chr01	Eucgr.A00903.1.v2.0	==	Chr16	Potri.016G018900.1.v3.1
Chr02	Eucgr.B02342.1.v2.0	==	Chr01	Potri.001G241900.1.v3.1
Chr02	Eucgr.B02328.1.v2.0	==	Chr06	Potri.006G086600.4.v3.1
Chr02	Eucgr.B02328.1.v2.0	==	Chr08	Potri.008G057400.2.v3.1
Chr02	Eucgr.B02348.1.v2.0	==	Chr09	Potri.009G032900.1.v3.1
Chr02	Eucgr.B03716.1.v2.0	==	Chr09	Potri.009G048700.2.v3.1
Chr04	Eucgr.D01917.1.v2.0	==	Chr01	Potri.001G109400.1.v3.1
Chr04	Eucgr.D01917.1.v2.0	==	Chr03	Potri.003G122400.1.v3.1
Chr04	Eucgr.D01435.1.v2.0	==	Chr06	Potri.006G016200.2.v3.1
Chr04	Eucgr.D01435.1.v2.0	==	Chr16	Potri.016G009700.1.v3.1
Chr05	Eucgr.E01509.1.v2.0	==	Chr01	Potri.001G122800.2.v3.1
Chr05	Eucgr.E01509.1.v2.0	==	Chr02	Potri.002G144200.2.v3.1
Chr05	Eucgr.E01509.1.v2.0	==	Chr03	Potri.003G110800.1.v3.1
Chr05	Eucgr.E03895.1.v2.0	==	Chr06	Potri.006G016200.2.v3.1
Chr05	Eucgr.E03895.1.v2.0	==	Chr16	Potri.016G009700.1.v3.1
Chr06	Eucgr.F03414.1.v2.0	==	Chr01	Potri.001G415200.1.v3.1
Chr06	Eucgr.F03523.1.v2.0	==	Chr01	Potri.001G361700.2.v3.1
Chr06	Eucgr.F01003.1.v2.0	==	Chr01	Potri.001G409500.1.v3.1
Chr06	Eucgr.F01003.1.v2.0	==	Chr01	Potri.001G415200.1.v3.1
Chr06	Eucgr.F01978.1.v2.0	==	Chr01	Potri.001G473200.1.v3.1
Chr06	Eucgr.F03414.1.v2.0	==	Chr01	Potri.001G409500.1.v3.1
Chr06	Eucgr.F04276.1.v2.0	==	Chr02	Potri.002G073400.3.v3.1
Chr06	Eucgr.F03769.1.v2.0	==	Chr02	Potri.002G086100.1.v3.1
Chr06	Eucgr.F03769.1.v2.0	==	Chr05	Potri.005G175300.1.v3.1
Chr06	Eucgr.F04276.1.v2.0	==	Chr05	Potri.005G186500.2.v3.1
Chr06	Eucgr.F04460.1.v2.0	==	Chr05	Potri.005G095100.1.v3.1
Chr06	Eucgr.F03414.1.v2.0	==	Chr11	Potri.011G131100.1.v3.1
Chr06	Eucgr.F01003.1.v2.0	==	Chr11	Potri.011G131100.1.v3.1
Chr06	Eucgr.F02630.1.v2.0	==	Chr13	Potri.013G114900.1.v3.1
Chr06	Eucgr.F02630.1.v2.0	==	Chr19	Potri.019G085600.1.v3.1
Chr07	Eucgr.G02939.1.v2.0	==	Chr01	Potri.001G241700.1.v3.1
Chr07	Eucgr.G03258.1.v2.0	==	Chr01	Potri.001G023500.1.v3.1
Chr07	Eucgr.G03258.1.v2.0	==	Chr03	Potri.003G202100.3.v3.1
Chr07	Eucgr.G02939.1.v2.0	==	Chr06	Potri.006G086600.4.v3.1
Chr07	Eucgr.G02939.1.v2.0	==	Chr08	Potri.008G057400.2.v3.1
Chr07	Eucgr.G02163.1.v2.0	==	Chr08	Potri.008G131700.1.v3.1
Chr07	Eucgr.G02939.1.v2.0	==	Chr09	Potri.009G032700.2.v3.1
Chr07	Eucgr.G02163.1.v2.0	==	Chr10	Potri.010G110700.1.v3.1
Chr07	Eucgr.G02163.1.v2.0	==	Chr17	Potri.017G125200.1.v3.1
Chr08	Eucgr.H03356.1.v2.0	==	Chr01	Potri.001G326000.1.v3.1
Chr08	Eucgr.H01009.1.v2.0	==	Chr02	Potri.002G195600.1.v3.1
Chr08	Eucgr.H04039.1.v2.0	==	Chr02	Potri.002G195600.1.v3.1
Chr08	Eucgr.H01257.1.v2.0	==	Chr05	Potri.005G125800.1.v3.1
Chr08	Eucgr.H01257.1.v2.0	==	Chr07	Potri.007G029200.1.v3.1
Chr08	Eucgr.H02292.1.v2.0	==	Chr07	Potri.007G053500.1.v3.1
Chr08	Eucgr.H04039.1.v2.0	==	Chr10	Potri.010G143200.1.v3.1
Chr08	Eucgr.H01009.1.v2.0	==	Chr10	Potri.010G143200.1.v3.1
Chr08	Eucgr.H01009.1.v2.0	==	Chr14	Potri.014G120000.2.v3.1
Chr08	Eucgr.H04039.1.v2.0	==	Chr14	Potri.014G120000.2.v3.1
Chr09	Eucgr.I01625.1.v2.0	==	Chr01	Potri.001G326000.1.v3.1
Chr09	Eucgr.I02451.1.v2.0	==	Chr05	Potri.005G123800.3.v3.1
Chr09	Eucgr.I00236.1.v2.0	==	Chr05	Potri.005G190300.1.v3.1
Chr09	Eucgr.I02451.1.v2.0	==	Chr07	Potri.007G026300.1.v3.1
Chr09	Eucgr.I00236.1.v2.0	==	Chr19	Potri.019G007100.1.v3.1
Chr09	Eucgr.I00236.1.v2.0	==	Chr19	Potri.019G011200.1.v3.1
Chr10	Eucgr.J02815.1.v2.0	==	Chr01	Potri.001G168800.1.v3.1
Chr10	Eucgr.J02040.1.v2.0	==	Chr01	Potri.001G241700.1.v3.1
Chr10	Eucgr.J02815.1.v2.0	==	Chr03	Potri.003G065400.1.v3.1
Chr10	Eucgr.J01594.1.v2.0	==	Chr04	Potri.004G089800.2.v3.1
Chr10	Eucgr.J02040.1.v2.0	==	Chr06	Potri.006G086600.4.v3.1
Chr10	Eucgr.J01244.1.v2.0	==	Chr08	Potri.008G057400.2.v3.1
Chr10	Eucgr.J01594.1.v2.0	==	Chr08	Potri.008G131700.1.v3.1
Chr10	Eucgr.J02040.1.v2.0	==	Chr08	Potri.008G057400.2.v3.1
Chr10	Eucgr.J02040.1.v2.0	==	Chr09	Potri.009G032700.2.v3.1
Chr10	Eucgr.J01594.1.v2.0	==	Chr10	Potri.010G110700.1.v3.1
Chr10	Eucgr.J01594.1.v2.0	==	Chr17	Potri.017G125200.1.v3.1
Chr11	Eucgr.K03117.1.v2.0	==	Chr01	Potri.001G241700.1.v3.1
Chr11	Eucgr.K01320.1.v2.0	==	Chr06	Potri.006G114200.1.v3.1
Chr11	Eucgr.K03117.1.v2.0	==	Chr06	Potri.006G086600.4.v3.1
Chr11	Eucgr.K00873.1.v2.0	==	Chr07	Potri.007G119000.1.v3.1
Chr11	Eucgr.K03117.1.v2.0	==	Chr08	Potri.008G057400.2.v3.1
Chr11	Eucgr.K03117.1.v2.0	==	Chr09	Potri.009G032700.2.v3.1
Chr11	Eucgr.K02752.1.v2.0	==	Chr12	Potri.012G093900.1.v3.1
Chr11	Eucgr.K02752.1.v2.0	==	Chr15	Potri.015G091200.1.v3.1
Chr11	Eucgr.K01320.1.v2.0	==	Chr16	Potri.016G143900.1.v3.1
Chr11	Eucgr.K00873.1.v2.0	==	Chr17	Potri.017G041500.1.v3.1
